# Supplementary material for: Au-modified three-dimensionally ordered macroporous ZnO:In for high-performance ethanol sensors
Source: Royal Society of Chemistry journal article supplement (doi:10.1039/c9tc06750g), 2020-01-01
Supplement: c9tc06750g1.pdf [file c9tc06750g1.pdf]

## Electronic Supplementary Information

### Au-Modified Three-dimensionally Ordered Macroporous ZnO:In for High-Performance Ethanol Sensors

*Zhihua Wang, Ziwei Tian, Dongmei Han, Fubo Gu\**

State Key Laboratory of Chemical Resource Engineering, Beijing University of Chemical  
Technology, Beijing 100029, China

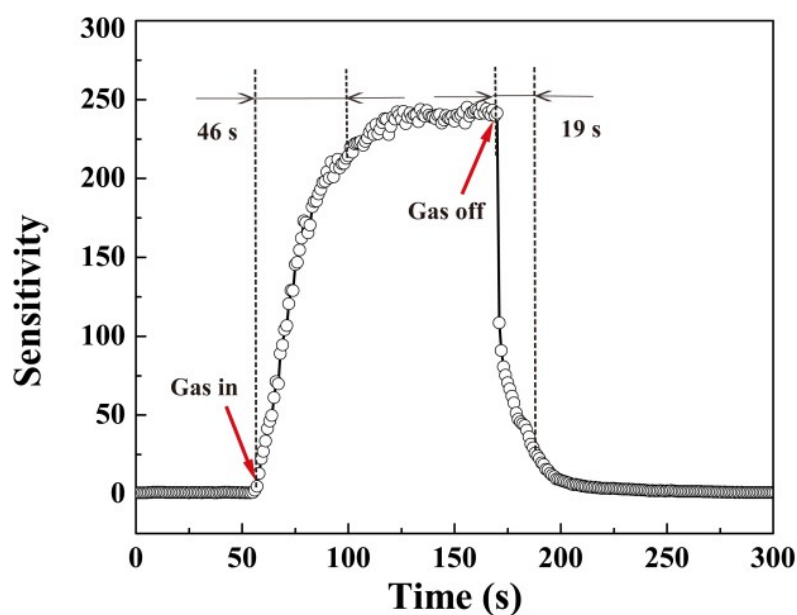

**Fig.S1** Response and recovery curve of the 3DOM 0.050% Au-ZnO:In sensor.

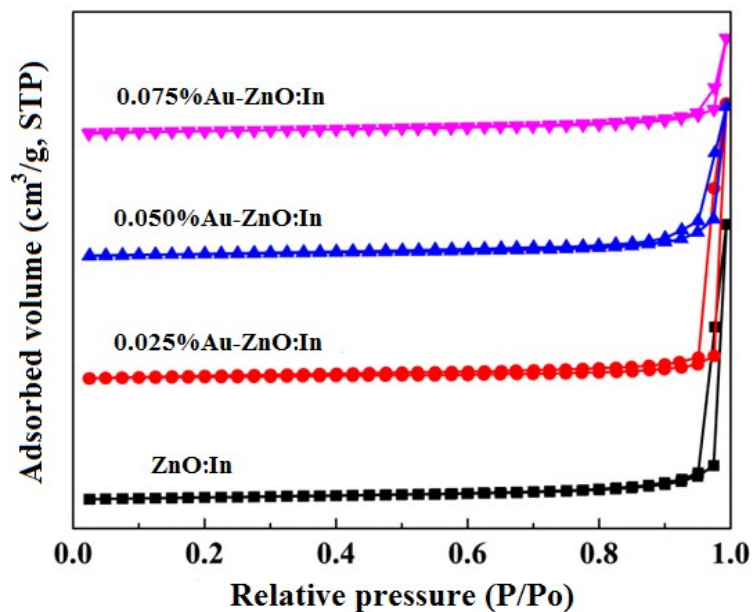

**Fig.S2** Nitrogen adsorption-desorption isotherms of the 3DOM Au-ZnO:In with different Au contents.

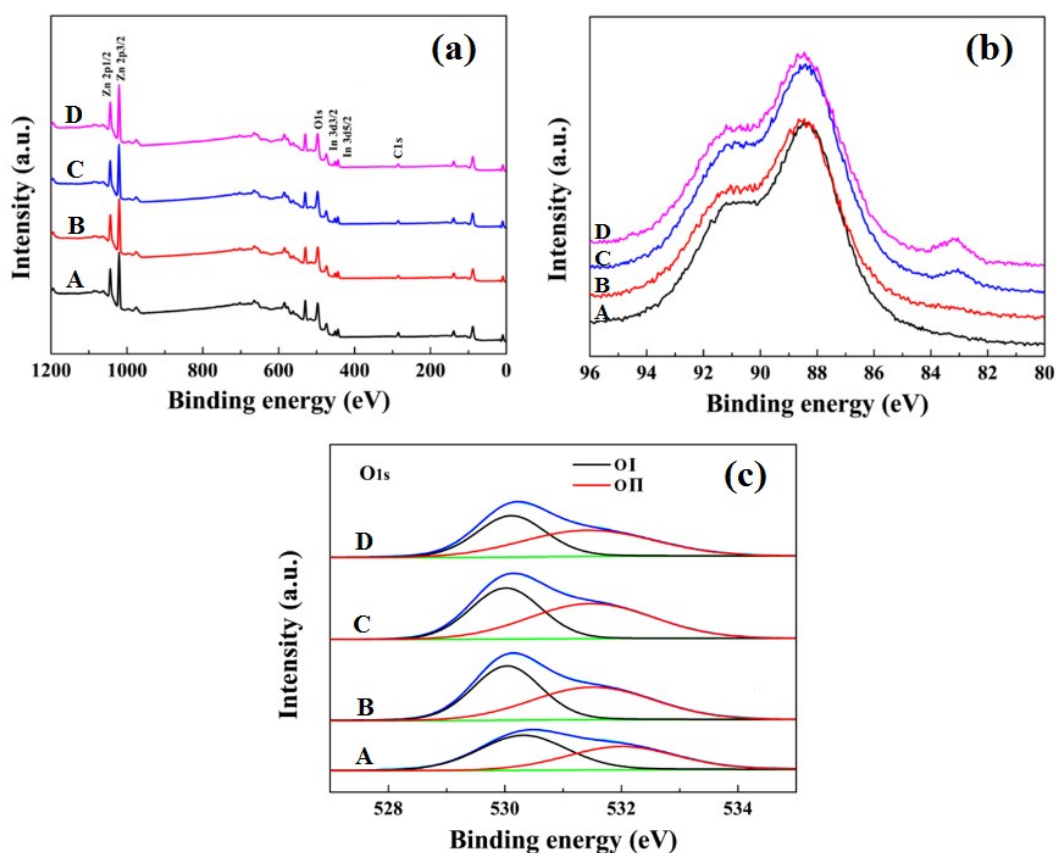

**Fig.S3** Full-range XPS spectra (a), high resolution XPS spectra of the Au 4f and Zn 3p peaks (b) and high resolution XPS spectra for the O 1s peaks (c) of 3DOM (A) ZnO:In, (B) 0.025% Au-ZnO:In, (C) 0.050% Au-ZnO:In and (D) 0.075% Au-ZnO:In.
